1 Curated Multiple Sequence Alignment for the Adenomatous  
2 Polyposis Coli (*APC*) Gene and Accuracy of *In Silico*  
3 Pathogenicity Predictions

4  
5 Short Title: Sequence Alignment-Based In Silico Pathogenicity Predictions for APC  
6

7 Alexander D. Karabachev<sup>1</sup>, Dylan J. Martini<sup>1,#a</sup>, David J. Hermel<sup>1#b</sup>, Dana Solcz<sup>1</sup>, Marcy E.  
8 Richardson<sup>2</sup>, Tina Pesaran<sup>2</sup>, Indra Neil Sarker<sup>3,4</sup>, Marc S. Greenblatt<sup>1\*</sup>  
9

10 <sup>1</sup> Department of Medicine, University of Vermont, Larner College of Medicine, Burlington VT;

11 <sup>2</sup>Ambry Genetics, Aliso Viejo, CA;

12 <sup>3</sup>Center for Biomedical Informatics, Brown University, Providence, RI

13 <sup>4</sup>Rhode Island Quality Institute, Providence, RI

14 <sup>#a</sup>Current Address: Emory University School of Medicine, Atlanta, GA;

15 <sup>#b</sup>Current Address: Keck School of Medicine of USC, Los Angeles, CA;

16

17 \*Corresponding Author:

18 Email: [Marc.Greenblatt@uvmhealth.org](mailto:Marc.Greenblatt@uvmhealth.org) (MSG)

19

20

21

22 **Abstract**

23 Computational algorithms are often used to assess pathogenicity of Variants of Uncertain  
24 Significance (VUS) that are found in disease-associated genes. Most computational methods  
25 include analysis of protein multiple sequence alignments (PMSA), assessing interspecies  
26 variation. Careful validation of PMSA-based methods has been done for relatively few genes,  
27 partially because creation of curated PMSAs is labor-intensive. We assessed how PMSA-based  
28 computational tools predict the effects of the missense changes in the *APC* gene, in which  
29 pathogenic variants cause Familial Adenomatous Polyposis. Most Pathogenic or Likely  
30 Pathogenic *APC* variants are protein-truncating changes. However, public databases now  
31 contain thousands of variants reported as missense. We created a curated *APC* PMSA that  
32 contained >3 substitutions/site, which is large enough for statistically robust *in silico* analysis.  
33 The creation of the PMSA was not easily automated, requiring significant querying and  
34 computational analysis of protein and genome sequences. Of 1924 missense *APC* variants in  
35 the NCBI ClinVar database, 1800 (93.5%) are reported as VUS. All but two missense variants  
36 listed as P/LP occur at canonical splice or Exonic Splice Enhancer sites. Pathogenicity  
37 predictions by five computational tools (Align-GVGD, SIFT, PolyPhen2, MAPP, REVEL) differed  
38 widely in their predictions of Pathogenic/Likely Pathogenic (range 17.5–75.0%) and  
39 Benign/Likely Benign (range 25.0–82.5%) for *APC* missense variants in ClinVar. When applied  
40 to 21 missense variants reported in ClinVar as Benign, the five methods ranged in accuracy  
41 from 76.2-100%. Computational PMSA-based methods can be an excellent classifier for  
42 variants of some hereditary cancer genes. However, there may be characteristics of the *APC*  
43 gene and protein that confound the results of *in silico* algorithms. A systematic study of these  
44 features could greatly improve the automation of alignment-based techniques and the use of  
45 predictive algorithms in hereditary cancer genes.

46

47 Author Summary

48 A critical problem in clinical genetics today is interpreting whether a genetic variant is benign or  
49 causes disease (pathogenic). Some of the hardest variants to interpret are those that change  
50 one amino acid for another in a protein sequence (a “missense variant”). Various computer  
51 programs are often used to predict whether mutations in disease-associated genes likely cause  
52 disease. Most computer programs involve studying how the gene has changed during  
53 evolution, comparing the protein sequences of different species by aligning them with each  
54 other. Variants in amino acids that have not tolerated mutation during evolution are usually  
55 predicted to be pathogenic, and variants in amino acids that have tolerated variation are usually  
56 predicted to be benign. High quality alignments are necessary to make accurate predictions.  
57 However, creating high quality alignments is difficult, not easily automated, and requires  
58 significant manual curation. Results from computer-generated predictions are used in current  
59 published guidelines as one tool for evaluating whether variants will disrupt the protein function  
60 and cause disease. These guidelines may be applied to genes in which single amino acid  
61 substitutions do not commonly cause disease. One such example is the APC gene, which is  
62 responsible for Familial Adenomatous Polyposis (FAP). Missense APC changes are not a  
63 common cause of FAP. Our analysis of APC demonstrated the difficulty of generating an  
64 accurate protein sequence alignment and the tendency of computer tools to overestimate the  
65 damaging effects of amino acid substitutions. Our results suggest that the rules for using  
66 computer-based tools to predict whether a variant causes disease should be modified when  
67 applied to genes in which missense variants rarely cause disease.

68 **Introduction**

69 Multi-gene panel testing is now routine for identifying hereditary cancer susceptibility, leading to  
70 increased detection of pathogenic mutations, which can improve clinical management.  
71 However, testing often identifies variants of uncertain significance (VUS), which are often  
72 missense amino acid (AA) substitutions, small in frame deletions and duplications, or non-  
73 coding changes [1, 2]. VUS in genes that predispose to hereditary cancer and other disorders  
74 are rapidly accumulating in variant databases. For example, the ClinVar database at the  
75 National Center for Biotechnology Information at the United States National Library of Medicine  
76 provides a freely accessible archive of variants with assertions regarding the pathogenicity of  
77 each variant with the indicated phenotype from submitting laboratories and expert panels [3].  
78 The classification of these VUS represents a major challenge in clinical genetics.  
79 Computational (*in silico*) tools have been developed to help predict whether or not the protein  
80 function will be disrupted (reviewed in [5]). *In silico* tools often use Protein Multiple Sequence  
81 Alignments (PMSA) to consider the evolutionary conservation and biophysical properties of the  
82 wild type and variant protein to make predictions of pathogenicity. PMSA-based computational  
83 methods are complicated to use properly (reviewed in [5]). The PMSA must be of high quality  
84 and sample enough species to provide reliable data [6,7]. These *in silico* methods have been  
85 validated for relatively few hereditary cancer genes in which pathogenic missense variants are  
86 not rare (BRCA1/2, the mismatch repair [MMR] genes, TP53, a few others) [6, 8, 9, 10, 11, 12].  
87 They have not often been validated for other genes, and for some genes predictive value was  
88 not strong [13]. However, they are often cited as evidence in favor or against pathogenicity of  
89 variants for genes in which validation is lacking. The American College of Genetics and  
90 Genomics (ACMG) and the Association for Molecular Pathology (AMP) published guidelines for  
91 evaluating the pathogenicity of variants in Mendelian disease genes, including general rules for  
92 the use of *in silico* tools [4].

93 Missense pathogenic variants are rare in some genes, including *APC*, the gene responsible for  
94 Familial Adenomatous Polyposis (FAP). *APC* has been sequenced frequently in clinical genetic  
95 testing, but few missense pathogenic variants have been identified, for reasons that have not  
96 been clearly demonstrated [14]. The increase in clinical DNA sequencing tests for cancer  
97 predisposition has led to an increase in missense VUSs in *APC* that require classification.  
98 Here we systematically apply *in silico* methods to *APC*, assessing the logistics and results of  
99 using these commonly available tools to predict pathogenicity of missense variants in a gene for  
100 which missense is an uncommon mechanism of pathogenicity.

101

## 102 **RESULTS**

### 103 **PMSA Creation**

104 Results from searching the NCBI Gene database for “*APC*” initially yielded reliable full length  
105 *APC* protein sequences from 38 organisms. We encountered a number of challenges to the  
106 simple automated assembly of a meaningful *APC* PMSA, including:

107 a) *Large inconsistencies with the APC human sequence.* In order to include only sequences  
108 which accurately reflect human biology, such sequences were omitted.

109 b) *Multiple APC isoforms were found for 21 organisms.* To choose the most appropriate  
110 isoform, all 104 sequences were aligned using Clustal2W. Isoforms that lacked a common  
111 beginning protein sequence of MAA were deleted (N=26). When duplicate sequences were  
112 found for the same species, the more complete sequence was used, and if similar length  
113 isoforms of the same organism were found with a common sequence initiation, the lowest  
114 number isoform was chosen.

115 c) *Large deletions or insertions.* Many of these could easily be identified as errors in automated  
116 identification of exon-intron boundaries. In most cases we could identify the appropriate  
117 boundary and either insert or delete the appropriate sequence. For insertions that were unique

118 to one organism, especially in areas of otherwise high homology, BLAST was used to seek  
119 other homologues of the inserted sequence, and assessed the relevant nucleotide sequence for  
120 plausible overlooked splice sites.

121 d) *Small deletions or insertions*. Short gaps that were confirmed to occur distant from an exon-  
122 intron boundary were allowed. The longest such gap was AA 1631-1637 in *Loxodonta africana*  
123 (African elephant) and *Trichechus manatus latirostris* (Florida manatee), a highly conserved  
124 region in other sequences. Because of the close taxonomic relationship between these two  
125 organisms, and the fact that their sequence was assembled on the same Broad Institute  
126 platform as many other species in our alignment that lack the deletion, we assessed this gap as  
127 likely real.

128 We constructed two PMSAs. Our goal was to create a curated PMSA that would optimize  
129 predictions for pathogenicity of variants from computational algorithms. This 10-sequence  
130 PMSA contained species chosen to reflect as closely as possible the 14-species PMSA  
131 previously reported for analyzing variants and validating computational algorithms in the MMR  
132 genes, in which missense VUS are common and *in silico* interpretation is frequently used [8].  
133 We identified full length APC sequences for 11 of these 14 species. The 10-species PMSA that  
134 we curated using the above criteria (Table 1, PMSA excerpt in Figure 1, full PMSA in  
135 Supplementary Figure 1) contained five mammalian APC sequences plus chicken (*Gallus*  
136 *gallus*), frog (*Xenopus laevis*), zebrafish (*Danio rerio*), sea urchin (*Strongylocentrotus*  
137 *purpuratus*), and sea squirt (*Ciona intestinalis*). A larger PMSA with the full set of 38 full length  
138 sequences also was constructed, with reconstitution of obvious missing exons but no detailed  
139 curation (Supplementary Figure 2).

140

141

142 **Table 1.** APC amino acid sequences from the NCBI database used in the ten species APC  
143 Protein Multiple Sequence Alignment (PMSA) and phylogenetic tree.

| Species                                             | APC            |
|-----------------------------------------------------|----------------|
| Human ( <i>Homo sapiens</i> )                       | AAA03586.1     |
| Monkey ( <i>Macaca mulatta</i> )                    | XP_014996065.1 |
| Cow ( <i>Bos taurus</i> )                           | NP_001069454.2 |
| Mouse ( <i>Mus musculus</i> )                       | NP_031488.2    |
| Opossum ( <i>Monodelphis domestica</i> )            | XP_007497871.1 |
| Chicken ( <i>Gallus gallus</i> )                    | XP_004949340.1 |
| Frog ( <i>Xenopus laevis</i> )                      | NP_001084351.1 |
| Zebrafish ( <i>Danio rerio</i> )                    | NP_001137312.1 |
| Sea urchin ( <i>Strongylocentrotus purpuratus</i> ) | XP_783363.3    |
| Sea squirt ( <i>Ciona intestinalis</i> )            | XP_018668496.1 |

144  
145 Manual curation was often necessary to identify and label correct exon-intron boundaries and  
146 address insertions, gaps, and poorly-conserved areas where the alignment was less certain. A  
147 small amount of manual curation of gaps and insertions was required for vertebrate species.  
148 The intronic regions flanking large insertions were examined and assessed as potential splice  
149 sites. Sites with a high splice score (see Methods) were interpreted as actual splice sites and  
150 retained for creation of the phylogenetic tree. Inserted sequences flanked by a lower than  
151 average splice site were omitted from further analyses.  
152 More extensive manual curation was required for *C. intestinalis* and *S. purpuratus*, the most  
153 distant species used, to ensure an accurate alignment and tree. Using BLAST+ on insertions in  
154 sea squirt and sea urchin that were not present in the human sequence, we identified  
155 sequences with little homology on inspection to the vertebrate APC sequences. Exon 1 (M1 to  
156 Q46) and Exon 5, 6, and 7 (A265 to K414) of sea squirt (*C. intestinalis*) and exon 6 (A260 to  
157 F477) of sea urchin (*S. purpuratus*) did not align with the other APC sequences, returned  
158 negative BLAST results, and were removed from the final PMSA. A region of of *S.purpuratus*  
159 was found with homology to a spindle fiber sequence, and a long region in its C-terminus was  
160 homologous to a herpesvirus sequence. Because the exons containing these sequences also

161 contained regions with high homology to APC, the full exons were retained in our PMSA. A  
162 large insertion in *S. purpuratus* containing many consecutive glutamines presumably represents  
163 a coding region microsatellite. Sequences flanking this insertion were found with high splice  
164 scores, so it was kept in the alignment.

165

### 166 **Evolutionary rate of APC:**

167 To predict if a given invariant position is invariant with statistical significance (>95% probability),  
168 the PMSA must contain >3.0 substitutions/site [6, 7]. In addition to our ten-sequence PMSA,  
169 curated alignments were created of nine and eight sequences that omitted the more distant  
170 species *Ciona intestinalis* (sea squirt) and *Strongylocentrotus purpuratus* (sea urchin) (data not  
171 shown). Applying the PHYLIP ProtPars package to the curated 8, 9, and 10 species APC  
172 PMSAs, we calculated that our ten species curated APC alignment contained 3.3 substitutions  
173 per site (subs/site), sufficient for proceeding with subsequent analyses (see Methods). Both  
174 eight- and nine-sequence PMSAs, omitting the nonvertebrate species, contained fewer than  
175 three subs/site. We calculated subs/site for six other PMSAs of cancer susceptibility genes  
176 using the same 10 species found on the Align-GVGD website (Table 2). APC had a  
177 comparable evolutionary rate with *CHEK2* and *PMS2*, whereas three MMR genes (*MLH1*,  
178 *MSH2*, *MSH6*) were better conserved (1.6-2.1 subs/site), and *RAD51* was the most well-  
179 conserved of the seven genes (0.62 subs/site).

180

181 **Table 2.** Substitutions per site in PMSAs of seven hereditary cancer genes using 10 species  
182 with evolutionary depth to sea squirt calculated using the PHYLIP ProtPars package.

183

| Protein | Substitutions per site |
|---------|------------------------|
| PMS2    | 3.4                    |
| APC     | 3.3                    |
| CHEK2   | 3.2                    |
| MSH6    | 2.8                    |



|       |      |
|-------|------|
| MLH1  | 2.1  |
| MSH2  | 1.6  |
| RAD51 | 0.62 |

184

## 185 **Phylogenetic Tree Construction**

186 Phylogenetic trees were generated using Bayesian, Maximum Likelihood, and Maximum  
187 Parsimony -based methods. The methods yielded similar trees, and the Maximum Parsimony -  
188 based examples are displayed in Figures 2A (10 species) and 2B (38 species). The  
189 relationships of the *APC* sequences among different species was as expected with sea urchin  
190 and sea squirt as the most distantly related organisms to humans.

191

## 192 ***APC* Variants from Public Databases**

193 In the LOVD database maintained by the International Society for Gastrointestinal Hereditary  
194 Tumors (InSiGHT), in July 2013 there were a total of 46 *APC* missense variants. In ClinVar in  
195 July 2018, there were a total of 4891 *APC* variants, of which 1988 are missense. Using filters of  
196 “missense, pathogenic, likely pathogenic”, yielded nine variants in the ClinVar database with  
197 assertions of Pathogenic/Likely Pathogenic (P/LP) and no conflicting interpretations of  
198 pathogenicity per ClinVar criteria. Upon further examination, it was determined that two variants  
199 were somatic mutations, and the pathogenicity of the other seven variants were inferred to be  
200 from a splicing abnormality. Six were found to occur at canonical splice sites, and the seventh  
201 occurs within an Exonic Splicing Enhancer sequence, with confirming RNA and *in vitro* evidence  
202 of splicing alterations [15] (Supplementary Table). Thus, no pathogenic missense germline  
203 *APC* variants were documented in ClinVar using these search parameters. There are n=21  
204 variants (1.3% of all missense variants) with assertions of Benign or Likely Benign (B/LB). All of  
205 these were classified using criteria other than *in silico* algorithms. Of the remaining variants in

206 ClinVar, 93.5% of the missense variants are reported as “Unknown Significance”; the rest are  
207 classified as either “Other”, or display conflicting assertions of pathogenicity (Table 3).

208

209 **Supplementary Table 1.** Nine APC missense variants using filters for “missense, pathogenic,  
210 likely pathogenic”.

| APC Classified Pathogenic Variant | ClinVar Classification | Type of Variant             |
|-----------------------------------|------------------------|-----------------------------|
| R141S                             | Pathogenic             | Splice Site                 |
| K516N                             | Pathogenic             | Splice Site                 |
| K581N                             | Likely Pathogenic      | Splice Site                 |
| S634R                             | Likely Pathogenic      | Exonic Splice Enhancer site |
| R653M                             | Pathogenic             | Splice Site                 |
| R653G                             | Pathogenic             | Splice Site                 |
| R653K                             | Pathogenic             | Splice Site                 |
| G1120E                            | Pathogenic             | Somatic                     |
| S1395C                            | Pathogenic             | Somatic                     |

211

212 Supplementary Table 1 Legend: Two are due to somatic mutations, six are located in canonical  
213 splice sites and one occurs within an Exonic Splicing Enhancer sequence. [p.S1028N was  
214 reclassified as pathogenic in the ClinVar database after we collected the data – Not included]  
215 <https://preview.ncbi.nlm.nih.gov/clinvar/variation/428186/>

216

217 **Table 3.** APC missense variants from the NCBI ClinVar database with Clinical Significance  
218 Classifications of: “Benign”, “Likely Benign”, “Pathogenic”, “Likely Pathogenic”, “Uncertain  
219 Significance” and “Conflicting Interpretations of Pathogenicity”.

220

| ClinVar “Clinical Significance” for APC      | Missense Variants (N=1924) |
|----------------------------------------------|----------------------------|
| Benign/Likely Benign                         | 21 (1.1%)                  |
| Pathogenic/Likely Pathogenic                 | 0 (0%)                     |
| Uncertain Significance                       | 1800 (93.5%)               |
| Conflicting Interpretations of Pathogenicity | 103 (5.4%)                 |

221

222 Table 3 Legend: Substitutions flanking the 12 splice sites found in Human APC were removed  
223 from the list of selected missense variants. A total of 1924 variants that met the above  
224 classification criteria and were not located in exon boundaries were used for analysis. Of the  
225 1924 variants, 1.1% were classified as benign, none were classified as pathogenic and 98.9 %  
226 were classified as uncertain or conflicting interpretation of pathogenicity.

227

### 228 **Computational methods to classify APC variants**

229 To predict the pathogenic effects of missense substitutions, multiple computational algorithms  
230 based on PMSAs and evolutionary conservation have been developed. We applied five of these  
231 tools (SIFT, PolyPhen2, Align-GVGD, MAPP, REVEL) to analyze APC missense variants.

232 For the n=21 variants classified in ClinVar as B/LB, the prediction algorithms showed good  
233 concordance with each other and with the ClinVar classifications (Table 4A). REVEL and A-  
234 GVGD showed 100% concordance with ClinVar, SIFT predicted 95.5%, PolyPhen2 81.8%, and  
235 MAPP 77.8% to be Neutral. For the n=1904 variants classified as VUS, “Other”, or conflicting,  
236 the output differed significantly among the four non-aggregating methods (excluding REVEL).

237 The proportion of variants predicted to be “Benign” were MAPP 25.0%, PolyPhen2 41.0%, SIFT  
238 68.1%, Align-GVGD 82.5% (Table 4A). For MAPP, we initially used the cutoff score of 4.5  
239 previously established to distinguish P/LP from B/LB *MLH1* and *MSH2* variants [8]. This cutoff  
240 predicted 75% of APC VUS to be pathogenic, an improbable proportion. With no known  
241 pathogenic missense variants, it is unclear what cutoff score is appropriate. The lowest MAPP  
242 cutoff score (34.79) that achieved a specificity and total accuracy of 100% for classifying benign  
243 variants predicts 2.6% of VUS as pathogenic.

244

245 **Table 4A. Predictions of substitution severity with different *in silico* programs**

246

|           |                                      | Benign Variants (N=21) |             |                | VUS (N=1904)           |
|-----------|--------------------------------------|------------------------|-------------|----------------|------------------------|
| Method    | Classification                       | Total (%)              | Specificity | Total Accuracy | Predictions: Total (%) |
| ClinVar   | Pathogenic                           | 0 (0%)                 | -           | -              | -                      |
|           | Benign                               | 21 (100%)              |             |                | -                      |
| REVEL     | Deleterious (REVEL score $\geq$ 0.5) | 0 (0%)                 | 100%        | 100%           | N/A                    |
|           | Neutral (REVEL score $<$ 0.5)        | 21 (100%)              |             |                | N/A                    |
| A-GVGD    | Class C65 (Deleterious moderate)     | 0 (0%)                 | 100%        | 100%           | <b>77 (4.0%)</b>       |
|           | Class C55 (Deleterious supporting)   | 0 (0%)                 |             |                | <b>37 (1.9%)</b>       |
|           | Class C45 (Deleterious supporting)   | 0 (0%)                 |             |                | <b>8 (0.42%)</b>       |
|           | Class C35 (Deleterious supporting)   | 0 (0%)                 |             |                | <b>27 (1.4%)</b>       |
|           | Class C25 (Deleterious supporting)   | 0 (0%)                 |             |                | <b>64 (3.3%)</b>       |
|           | Class C15 (Deleterious supporting)   | 0 (0%)                 |             |                | <b>120 (6.3%)</b>      |
|           | Class C0 (Neutral)                   | 21 (100%)              |             |                | <b>1571 (82.5%)</b>    |
| SIFT      | Deleterious                          | 1 (4.8%)               | 95.4%       | 95.2%          | <b>608 (31.9%)</b>     |
|           | Tolerated                            | 20 (95.2%)             |             |                | <b>1296 (68.1%)</b>    |
| PolyPhen2 | Probably Damaging                    | 1 (4.8%)               | 84.0%       | 80.9%          | <b>814 (42.8%)</b>     |
|           | Possibly Damaging                    | 3 (13.3%)              |             |                | <b>309 (16.2%)</b>     |
|           | Benign                               | 17 (80.9%)             |             |                | <b>781 (41.0%)</b>     |
| MAPP      | Pathogenic (MAPP score $\geq$ 4.5)   | 5 (23.8%)              | 80.7%       | 76.2%          | <b>1428 (75.0%)</b>    |
|           | Neutral (MAPP score $<$ 4.5)         | 16 (76.2%)             |             |                | <b>476 (25.0%)</b>     |

247

248 Table 4A Legend: Predictions of pathogenicity for APC missense variants were made using  
 249 REVEL, A-GVGD, SIFT, PolyPhen2 and MAPP. REVEL output classes were designated as  
 250 “Deleterious” for variants with a REVEL score  $\geq$  0.5 and “Neutral” with a REVEL score  $<$  0.5  
 251 [16]. Assigning A-GVGD output Classes as “Neutral”, “Deleterious moderate” and “Deleterious  
 252 supporting” are based on probabilities from [17] and quantitative modeling of the ACMG/AMP  
 253 criteria for assigning pathogenicity [4, 18]. SIFT predicts substitutions with SIFT scores less than  
 254 0.05 as “Deleterious” and scores equal to or greater than 0.05 as “Tolerated” [19]. PolyPhen2  
 255 predicts variants based on a Position Specific Independent Count (PSIC) score as “Benign” and  
 256 “Probably Damaging” with high confidence, while a prediction of “Possibly Damaging” is  
 257 predicted to be damaging, but with low confidence [20]. For MAPP, we used a cutoff score of  
 258 4.5 to predict “Pathogenic” versus “Neutral” substitutions based the cutoff used to distinguish  
 259 pathogenic and neutral variants for MLH1 and MSH2. [8].

260

261 We explored the hypothesis that protein structural features would be associated with the  
262 likelihood that a VUS was pathogenic or benign. APC contains multiple repeats of the  $\beta$ -catenin  
263 binding and armadillo repeats, plus domains for oligomerization, and binding to microtubules,  
264 and EB1 and DLG proteins [21]. We hypothesized that missense variants 1) in the  $\beta$ -catenin  
265 binding and armadillo repeats would be neutral, since there was domain redundancy, 2) in the  
266 non-repeated domains would be more likely to be pathogenic, and 3) in unstructured regions  
267 would be neutral. There was no difference in the distribution of variants classified in ClinVar as  
268 neutral versus VUS relative to the beta catenin, armadillo, or other domains (Table 4b).

269

270 **Table 4B.** Proportion of Benign/Likely Benign variants and Variants of Unknown Significance by  
271 APC Protein Structural Feature.

| Domain        | Benign/Likely Benign | Unknown Significance |
|---------------|----------------------|----------------------|
| Beta catenin  | 5 (23.8%)            | 606 (31.8%)          |
| Armadillo     | 1 (4.8%)             | 156 (8.2%)           |
| Other domains | 4 (19.0%)            | 378 (19.9%)          |
| Not in domain | 11 (52.4%)           | 764 (40.1%)          |
| Total         | 21                   | 1904                 |

272

273 Per our examination of the ClinVar database in May 2018, all APC missense mutations noted as  
274 P/LP were found to be somatic mutations, or located in canonical splice sites, or located in  
275 Exonic Splicing Enhancer sequences. Shortly after we closed our data set, p.S1028N, located  
276 in the first of four highly conserved 15-amino acid repeats within the  $\beta$ -catenin binding domain,  
277 was submitted to ClinVar by Ambry Genetics and classified as Likely Pathogenic. The evidence  
278 for this classification includes, as per the ACMG/AMP guidelines, segregation score  
279 (PP1\_Strong, six meioses), phenotype score (PS4\_Moderate), functional domain (PM1 [22]),  
280 population frequency score (PM2\_Supporting) and *in silico* data (PP3). There is no evidence of  
281 splice abnormality. This variant would reach LP regardless of *in silico* analysis. Further scrutiny  
282 of variants in this region demonstrates one other variant, p.N1026S, classified as “Conflicting

283 Interpretations of Pathogenicity” in ClinVar, which satisfies the ACMG/AMP guidelines as LP.  
284 The same criteria (PP1\_Strong, PS4\_Moderate, PM1, PM2) can be applied to p.N1026S, in  
285 addition to a functional defect (PS3) as reported in the literature [23, 22]. N1026 and S1028 are  
286 both located in the first 15-amino acid repeat of the  $\beta$ -catenin binding domain and after careful  
287 review are the only LP/P *APC* missense variants that we found in ClinVar in July 2018 that  
288 satisfy the ACMG/AMP guidelines.

289

## 290 **DISCUSSION**

291 *In silico* tools have been validated with accepted standards for relatively few genes, and the field  
292 would greatly benefit from refinement of standards for applying these tools. Factors that have  
293 been shown to be important for interpreting the output and reliability of computational algorithms  
294 include quality of PMSA (reviewed in [5]), and choice of variant data sets [24]. An important  
295 factor regarding data sets that has emerged recently is how predictors should not be evaluated  
296 on variants or proteins that were used to train their prediction models. This circularity could  
297 result in predictive values that are artificially inflated [24, 25], and could occur with either likely  
298 pathogenic or likely benign variants. We suggest that not enough attention has been assigned  
299 to an additional important factor, the likelihood that missense substitution is a major mechanism  
300 of pathogenicity for a gene.

301 Our analysis suggests possible revisions to the ACMG/AMP classification scheme for  
302 pathogenicity, which defines multiple criteria for evidence of benign or pathogenic effect, with  
303 strength ranging from “Supporting” to “Very Strong”, and rules for combining different types of  
304 evidence [4]. For example, criterion BP1, “Missense variant in a gene for which primarily  
305 truncating variants are known to cause disease”, is relevant to *APC*. By this criterion, any  
306 missense *APC* variant is given “Supporting” evidence, the lowest level, favoring benign

307 classification of missense variants. Further study may help determine whether this criterion for  
308 benign classification should be upgraded from “Supporting” (for which estimated Odds of  
309 Pathogenicity is low [18], discussed below) to a higher level for these variants. The PP2  
310 criterion for pathogenicity presupposes that missense is a common mechanism for mutation;  
311 future studies should assess whether it is being inappropriately used when missense is a rare or  
312 unknown mechanism for a given gene.

313 Our work confirms that PMSA construction remains a labor-intensive task [26]. Current  
314 automated tools do not align unstructured regions accurately, resulting in errors that require  
315 manual curation of protein and nucleotide sequences in order to optimally curate a full  
316 alignment. For many genes, accurate PMSA can prove important for *in silico* analysis of variant  
317 pathogenicity [5]. There is no consensus in the assessment of PMSA quality, although metrics  
318 have been proposed [27]. We and others have proposed that a PMSA should include enough  
319 sequences to contain three subs/site in order for predictions to be statistically robust [6, 7], and  
320 for APC we achieved this threshold with the addition of non-vertebrate sequences. We chose  
321 our sequences to be consistent with PMSAs of other cancer susceptibility genes for which *in*  
322 *silico* algorithms have proven to be valuable tools for variant classification. PMSAs for 15 such  
323 genes are posted on the Align-GVGD (<http://agvgd.hci.utah.edu/about.php>) web site. We hope  
324 to promote standardization of methods for the purposes of *in silico* analysis for variant  
325 classification. It remains to be determined whether a consistent set of sequences will be most  
326 appropriate for other gene sets. The creation and validation of our APC PMSA did identify  
327 interesting features of gene evolution and of genome annotation and analysis, and we anticipate  
328 that PMSAs across gene families are likely to elucidate specific structure-function relationships  
329 and molecular pathways of critical cellular functions. The full APC PMSA can be seen in  
330 Supplementary Figure 1, where it can be used for purposes that are beyond the scope of this  
331 paper.

332 One cannot assume that *in silico* tools that are valuable predictors for one gene will perform as  
333 well for other genes. The majority of *APC* missense variants in ClinVar are likely to be benign,  
334 given the paucity of missense pathogenic variants identified in over two decades of clinical *APC*  
335 testing. An example of a similar gene is *CDH1*, in which pathogenic missense variants also are  
336 rare. An expert panel studying the *CDH1* gene has recommended that computational methods  
337 not be used for missense *CDH1* variants [28]. Thus, tools that work well for genes that are  
338 commonly inactivated by missense changes [29, 30, 8, 12] can be misleading for genes that are  
339 rarely inactivated by missense. For such genes, traditional *in silico* tools will likely overestimate  
340 the probability of pathogenicity of any missense variant.

341 The ClinGen Sequence Variant Interpretation working group has estimated that the “Supporting”  
342 level of evidence confers approximately 2.08/1 odds in favor of pathogenicity [18], or a 67.5%  
343 probability of pathogenicity. Our current analyses of *APC* variants suggest that the likelihood  
344 that a missense *APC* variant is pathogenic is far lower than 1%. Despite this, our curated *APC*  
345 PMSA and several *in silico* prediction tools all predicted a significant fraction of missense  
346 variants to be pathogenic. The methods that we used varied widely in their predictions for *APC*  
347 VUS; predictions of Pathogenic or Likely Pathogenic ranged from 17.5% to 75%, all of which are  
348 higher than the likely figure by at least an order of magnitude. This provides mathematical  
349 support for not using *in silico* evidence in favor of pathogenicity (PP3 in the ACMG/AMP scheme  
350 [4]) for these genes. One approach might be to create a decision tree in which a gene must  
351 meet specific criteria before *in silico* evidence is applied. More work is needed in order to  
352 understand which genes require pre-curation to assess whether PMSA-based or other *in silico*  
353 methods are likely to be useful. A difference between functional or structural relevance to the  
354 protein and clinical relevance may occur if the assayed function is not crucial to the phenotype,  
355 or perhaps from domain redundancy or other protein structural features.



356 Another important factor regarding data sets is whether the subject was being tested because of  
357 clinical suspicion, or whether broad panel testing, whole exome or whole genome sequencing  
358 yielded a variant in the absence of any known clinical features. The degree of clinical suspicion  
359 is difficult to discern from the majority of ClinVar APC variants. The prior probability of  
360 pathogenicity [8] will be much lower for a variant discovered incidentally through whole exome  
361 sequencing compared with one identified through clinical testing because of a strong history of  
362 polyposis and/or colon cancer, with intermediate scenarios also possible.

363 Computational methods can be an excellent classifier for missense variants in hereditary cancer  
364 genes where missense is a common mechanism of pathogenicity [8-12]. However, known  
365 pathogenic APC missense germline variants are rare. It is possible that none exist outside of  
366 the first 15-amino acid repeat of the  $\beta$ -catenin binding domain, and it is unknown how many  
367 other pathogenic missense variants are located in this 15 amino acid repeat, complicating the  
368 use of computational tools. Further analysis of this region is necessary to understand the role of  
369 missense APC variants and the value of *in silico* algorithms. The  $\beta$ -catenin binding repeats may  
370 be the only specific region of 15 AA out of the 2843 AA of APC in which *in silico* methods may  
371 be predictive of clinical pathogenicity. A similar observation to the use of *in silico* analysis has  
372 been made regarding the BRCT domain of BRCA1 [5]. There may be characteristics of the  
373 APC gene and protein that confound the results of *in silico* algorithms. One plausible hypothesis  
374 for the failure of missense variants to abrogate APC function is the redundancy of APC  
375 important structural elements (armadillo repeats,  $\beta$ -catenin and axin binding sites) [21], so the  
376 inactivation of a single repeat might not eliminate binding to the target to a clinically relevant  
377 level.

378 Defining features that distinguish genes for which missense is a common (e.g., MMR genes [8])  
379 versus uncommon (e.g., *CDH1* [31, 28], *RB1* [32]) pathogenic mechanism would significantly  
380 improve the application of *in silico* tools to variant classification. We propose that *in silico*

381 methods to assess missense variants (PP3 and BP4 in the ACMG/AMP guidelines [4]) be used  
382 sparingly for any gene where strong evidence suggests that missense rarely causes  
383 pathogenicity. Future work might consider whether BP4 (concordance for “benign” classification  
384 among multiple methods) might be replaced by BP1 (truncation predominates, missense  
385 unlikely) in such cases. Our results suggest that a systematic study of variant pathogenicity and  
386 protein features such as domain structure is warranted to improve the use of predictive  
387 algorithms in hereditary cancer genes.

388

389

## 390 **Methods**

391 Sequence and variant data are publically available from databases at the NLM. The study  
392 protocol was determined to be exempt from human subject regulations by Western IRB, as the  
393 data were de-identified.

### 394 **APC Sequences and Multiple Sequence Alignments, Phylogenetic analysis**

395 Amino acid sequences were collected by searching NCBI’s online Gene database  
396 (<http://www.ncbi.nlm.nih.gov/gene>), for “APC” in 2013, 2015, and 2018. PMSAs were made  
397 using Clustal Omega from the European Bioinformatics Institute (EBI)  
398 (<https://www.ebi.ac.uk/Tools/msa/clustalo>) and MUSCLE v3.8.31 [33] and examined using  
399 Mesquite, a software for evolutionary biology (<http://mesquiteproject.wikispaces.com/>) [40].

400 Misaligned areas were manually adjusted after the MUSCLE alignment. Gaps and insertions in  
401 the PMSA were analyzed to determine if the sequences in question were likely true indels or  
402 likely to be artifacts of computer analysis of genome annotation. BLAST searches were  
403 performed of inserted runs of AAs that did not align with any other species in our PMSA, using  
404 Protein BLAST, with default settings and query sequences of minimum length 30. For a

405 “positive BLAST”, the sequence results needed to show the presence of either homologs of the  
406 query sequence in APC from other organisms or from known protein domains. For a “negative  
407 BLAST”, the only result was the sequence from the species used in the search query. Exon  
408 boundaries were identified using the NCBI Gene Database. If an entire exon from one species  
409 did not align with the other sequences and was deemed BLAST negative, that exon was  
410 removed from the PMSA, using the rationale that it would be irrelevant to a variant found in  
411 humans.

412 Phylogenetic trees were constructed from the curated APC alignment using a Maximum  
413 Parsimony-based method implemented in PAUP\* (Phylogenetic Analysis Using Parsimony  
414 [\*and Other Methods]), Version 4, Maximum Likelihood [34, 39], and Bayesian method as  
415 implemented in MrBayes [35].

416 Nucleotide regions flanking prospective indels were analyzed using two splice site calculators:  
417 (1) SpliceSiteFrame, (<http://ibis.tau.ac.il/ssat/SpliceSiteFrame.htm>), a splice site calculator from  
418 Tel Aviv University, and (2) the online tool from the GENIE program [36]  
419 ([http://rulai.cshl.edu/new\\_alt\\_exon\\_db2/HTML/score.html](http://rulai.cshl.edu/new_alt_exon_db2/HTML/score.html)). The maximum 3' score for a perfect  
420 splice site would be 14.2, and the score for a perfect 5' splice score would be 12.6; these rarely  
421 occur. Average scores for the 3' and 5' sites are 7.9 and 8.1 respectively.

#### 422 Substitution per site

423 Absolute conservation of an amino acid in a PMSA can be determined with statistical  
424 significance ( $P < 0.05$ ) if the PMSA contains at least three substitutions per site (subs/site, i.e.,  
425 three times as many variants among all sequences as there are codons in the gene [6, 7]. In  
426 order to determine if APC alignments contained three subs/site, we used the PHYLIP  
427 (Phylogeny Inference Package) version 3.6a2 ProtPars program from the University of  
428 Washington, Department of Genetics (<http://evolution.genetics.washington.edu/phylip.html>), with  
429 the alignment converted to PHYLIP format. To convert the alignment from Clustal Omega

430 format to PHYLIP format and all other formats used during the analyses, the EMBOSS Seqret  
431 from EBI ([https://www.ebi.ac.uk/Tools/sfc/emboss\\_seqret/](https://www.ebi.ac.uk/Tools/sfc/emboss_seqret/)) and Mesquite Version 3.51 tools  
432 were used (<https://www.mesquiteproject.org/>).

### 433 ***Predictions of Effects of APC Missense Substitutions***

434 In July 2013, 46 APC missense variants were collected from the LOVD database maintained by  
435 the International Society for Gastrointestinal Hereditary Tumors (InSiGHT). On May 30, 2018,  
436 4891 variants observed by clinical genetic testing were collected from the ClinVar database  
437 (<http://www.ncbi.nlm.nih.gov/clinvar/>).

438 **Computational Algorithms:** The pathogenicity of each missense variant recorded in ClinVar  
439 was predicted using the programs Align-GVGD, SIFT, PolyPhen2 MAPP, and REVEL.

440 **AlignGVGD** uses PMSAs and the biophysical properties of amino acid substitutions to calculate  
441 the range of variation at each position. Each variant is assigned a grade of C65 to C0  
442 representing decreasing probability of deleterious, with C0 representing likely neutral AA  
443 substitutions. [37] (<http://agvgd.hci.utah.edu/about.php>).

444 **SIFT** (*Sorting Intolerant From Tolerant*) creates position specific scoring matrices derived from  
445 PMSAs. Each missense substitution predicted as “Tolerated” or “Affects Protein Function” [19].  
446 (<http://sift.bii.a-star.edu.sg/>).

447 **PolyPhen2** combines its own pre-built sequence alignment with protein structural  
448 characteristics, calculating a score used to classify each variant into three categories: benign,  
449 possibly damaging and probably damaging. (<http://genetics.bwh.harvard.edu/pph2/index.shtml>)  
450 [20]. We combined the categories of “possibly damaging” and “probably damaging”.

451 **MAPP** (*Multivariate Analysis of Protein Polymorphisms*) also combines a PMSA with the  
452 physiochemical characteristics of each AA position, predicting which AA should be deleterious  
453 and which should be neutral at each position in the PMSA [38]  
454 (<http://www.ngrl.org.uk/Manchester/page/mapp-multivariate-analysis-protein-polymorphism>).

455 **REVEL** (*Rare Exome Variant Ensemble Learner*) [16] is an ensemble method that uses  
456 machine learning to combine the results of 13 individual predictors, using independent test sets  
457 that did not overlap with sets used to train its component features. REVEL output classes were  
458 designated as “Deleterious” for variants with a REVEL score  $\geq 0.5$  and “Neutral” with a REVEL  
459 score  $< 0.5$  [16].

460

461

462 **ACKNOWLEDGMENTS:**

463 We are grateful for ongoing illuminating discussions with our colleagues on the ClinGen  
464 Sequence Variant Interpretation Working group and the InSiGHT Variant Interpretation  
465 Committee.

466

467 **DISCLOSURES OF CONFLICT OF INTEREST:**

468 MER and TP are employees of Ambry Genetics, Inc.

469 REFERENCES:

- 470 1. Hermel, D., McKinnon, W., Wood, M. and Greenblatt, M. (2016). Multi-gene panel testing for  
471 hereditary cancer susceptibility in a rural Familial Cancer Program. *Familial Cancer*, 16(1),  
472 pp.159-166.
- 473 2. Yurgelun M, Allen B, Kaldate R, Bowles K, Judkins T, Kaushik P et al. Identification of a  
474 Variety of Mutations in Cancer Predisposition Genes in Patients With Suspected Lynch  
475 Syndrome. *Gastroenterology*. 2015;149(3):604-613.e20.
- 476 3. Landrum M, Lee J, Benson M, Brown G, Chao C, Chitipiralla S et al. ClinVar: improving  
477 access to variant interpretations and supporting evidence. *Nucleic Acids Research*.  
478 2017;46(D1):D1062-D1067.
- 479 4. Richards S, Aziz N, Bale S, Bick D, Das S, Gastier-Foster J et al. Standards and guidelines  
480 for the interpretation of sequence variants: a joint consensus recommendation of the  
481 American College of Medical Genetics and Genomics and the Association for Molecular  
482 Pathology. *Genetics in Medicine*. 2015;17(5):405-423.
- 483 5. Tavtigian S, Greenblatt M, Lesueur F, Byrnes G. In silico analysis of missense substitutions  
484 using sequence-alignment based methods. *Human Mutation*. 2008;29(11):1327-1336.
- 485 6. Greenblatt M, Beaudet J, Gump J, Godin K, Trombley L, Koh J et al. Detailed computational  
486 study of p53 and p16: using evolutionary sequence analysis and disease-associated  
487 mutations to predict the functional consequences of allelic variants. *Oncogene*.  
488 2003;22(8):1150-1163.
- 489 7. Cooper G, Brudno M. Quantitative Estimates of Sequence Divergence for Comparative  
490 Analyses of Mammalian Genomes. *Genome Research*. 2003;13(5):813-820.
- 491 8. Thompson B, Greenblatt M, Vallee M, Herkert J, Tessereau C, Young E et al. Calibration of  
492 Multiple In Silico Tools for Predicting Pathogenicity of Mismatch Repair Gene Missense  
493 Substitutions. *Human Mutation*. 2012;34(1):255-265.

- 494 9. Tavtigian S, Samollow P, de Silva D, Thomas A. An Analysis of Unclassified Missense  
495 Substitutions in Human BRCA1. *Familial Cancer*. 2006;5(1):77-88.
- 496 10. Goldgar D, Easton D, Byrnes G, Spurdle A, Iversen E, Greenblatt M. Genetic evidence and  
497 integration of various data sources for classifying uncertain variants into a single model.  
498 *Human Mutation*. 2008;29(11):1265-1272.
- 499 11. Abkevich V, Zharkikh A, Deffenbaugh AM, Frank D, Chen Y, Shattuck D, Skolnick MH, Gutin  
500 A, Tavtigian SV. Analysis of missense variation in human BRCA1 in the context of  
501 interspecific sequence variation. *Journal of Medical Genetics*. 2004;41(7):492-507.
- 502 12. Miller P, Duraisamy S, Newell J, Chan P, Tie M, Rogers A et al. Classifying variants of  
503 CDKN2A using computational and laboratory studies. *Human Mutation*. 2011;32(8):900-911.
- 504 13. Rishishwar L, Varghese N, Tyagi E, Harvey S, Jordan I, McCarty N. Relating the Disease  
505 Mutation Spectrum to the Evolution of the Cystic Fibrosis Transmembrane Conductance  
506 Regulator (CFTR). *PLoS ONE*. 2012;7(8):e42336.
- 507 14. Scott R, Crooks R, Rose L, Attia J, Thakkinstian A, Thomas L et al. Germline Missense  
508 Changes in the APC Gene and Their Relationship to Disease. *Hereditary Cancer in Clinical  
509 Practice*. 2004;2(2):81.
- 510 15. Grandval P, Blayau M, Buisine M, Coulet F, Maugard C, Pinson S et al. The UMD-APC  
511 Database, a Model of Nation-Wide Knowledge Base: Update with Data from 3,581  
512 Variations. *Human Mutation*. 2014;35(5):532-536.
- 513 16. Ioannidis N, Rothstein J, Pejaver V, Middha S, McDonnell S, Baheti S et al. REVEL: An  
514 Ensemble Method for Predicting the Pathogenicity of Rare Missense Variants. *The  
515 American Journal of Human Genetics*. 2016;99(4):877-885.
- 516 17. Tavtigian, S., Deffenbaugh, Yin, Judkins, Scholl, Samollow, De Silva, Zharkikh, Thomas.  
517 Comprehensive statistical study of 452 BRCA1 missense substitutions with classification of  
518 eight recurrent substitutions as neutral. *Journal of Medical Genetics*. 2005;43(4):295-305.

- 519 18. Tavtigian S, Greenblatt M, Harrison S, Nussbaum R, Prabhu S, Boucher K et al. Modeling  
520 the ACMG/AMP variant classification guidelines as a Bayesian classification framework.  
521 Genetics in Medicine. 2018;20(9):1054-1060.
- 522 19. Ng PC, Henikoff S. SIFT: predicting amino acid changes that affect protein function. Nucleic  
523 Acids Research. 2003;31(13):3812-3814.
- 524 20. Adzhubei I, Jordan D, Sunyaev S. Predicting Functional Effect of Human Missense  
525 Mutations Using PolyPhen-2. Current Protocols in Human Genetics. 2013;76(1):7.20.1-  
526 7.20.41.
- 527 21. Aoki K, Taketo M. Adenomatous polyposis coli (APC): a multi-functional tumor suppressor  
528 gene. Journal of Cell Science. 2007;120(19):3327-3335.
- 529 22. Huber A, Weis W. The Structure of the  $\beta$ -Catenin/E-Cadherin Complex and the Molecular  
530 Basis of Diverse Ligand Recognition by  $\beta$ -Catenin. Cell. 2001;105(3):391-402.
- 531 23. Menéndez M, González S, Obrador–Hevia A, Domínguez A, Pujol M, Valls J et al.  
532 Functional Characterization of the Novel APC N1026S Variant Associated With Attenuated  
533 Familial Adenomatous Polyposis. Gastroenterology. 2008;134(1):56-64.
- 534 24. Grimm D, Azencott C, Aicheler F, Gieraths U, MacArthur D, Samocha K et al. The  
535 Evaluation of Tools Used to Predict the Impact of Missense Variants Is Hindered by Two  
536 Types of Circularity. Human Mutation. 2015;36(5):513-523.
- 537 25. Drost M, Tiersma Y, Thompson B, Frederiksen J, Keijzers G, Glubb D et al. A functional  
538 assay–based procedure to classify mismatch repair gene variants in Lynch syndrome.  
539 Genetics in Medicine. 2018;.
- 540 26. Adebali O, Reznik A, Ory D, Zhulin I. Establishing the precise evolutionary history of a gene  
541 improves prediction of disease-causing missense mutations. Genetics in Medicine.  
542 2016;18(10):1029-1036.
- 543 27. Ortuño F, Valenzuela O, Rojas F, Pomares H, Florido J, Urquiza J et al. Optimizing multiple  
544 sequence alignments using a genetic algorithm based on three objectives: structural



- 545 information, non-gaps percentage and totally conserved columns. *Bioinformatics*.  
546 2013;29(17):2112-2121.
- 547 28. Lee K, Krempely K, Roberts M, Anderson M, Carneiro F, Chao E et al. Specifications of the  
548 ACMG/AMP variant curation guidelines for the analysis of germline CDH1 sequence  
549 variants. *Human Mutation*. 2018;39(11):1553-1568.
- 550 29. Goldgar D, Easton D, Deffenbaugh A, Monteiro A, Tavtigian S, Couch F. Integrated  
551 Evaluation of DNA Sequence Variants of Unknown Clinical Significance: Application to  
552 BRCA1 and BRCA2. *The American Journal of Human Genetics*. 2004;75(4):535-544.
- 553 30. Easton D, Deffenbaugh A, Pruss D, Frye C, Wenstrup R, Allen-Brady K et al. A Systematic  
554 Genetic Assessment of 1,433 Sequence Variants of Unknown Clinical Significance in the  
555 BRCA1 and BRCA2 Breast Cancer–Predisposition Genes. *The American Journal of Human*  
556 *Genetics*. 2007;81(5):873-883.
- 557 31. Hansford S, Kaurah P, Li-Chang H, Woo M, Senz J, Pinheiro H et al. Hereditary Diffuse  
558 Gastric Cancer Syndrome. *JAMA Oncology*. 2015;1(1):23.
- 559 32. Dommering C, Mol B, Moll A, Burton M, Cloos J, Dorsman J et al. RB1 mutation spectrum in  
560 a comprehensive nationwide cohort of retinoblastoma patients. *Journal of Medical Genetics*.  
561 2014;51(6):366-374.
- 562 33. Edgar R. MUSCLE: multiple sequence alignment with high accuracy and high throughput.  
563 *Nucleic Acids Research*. 2004;32(5):1792-1797.
- 564 34. Stamatakis A. RAxML version 8: a tool for phylogenetic analysis and post-analysis of large  
565 phylogenies. *Bioinformatics*. 2014;30(9):1312-1313.
- 566 35. Ronquist F, Huelsenbeck J. MrBayes 3: Bayesian phylogenetic inference under mixed  
567 models. *Bioinformatics*. 2003;19(12):1572-1574.
- 568 36. Reese M, Eeckman F, Kulp D, Haussler D. Improved Splice Site Detection in Genie. *Journal*  
569 *of Computational Biology*. 1997;4(3):311-323.

- 570 37. Tavtigian SV, Byrnes GB, Goldgar DE, Thomas A. Classification of rare missense  
571 substitutions, using risk surfaces, with genetic-and molecular-epidemiology applications  
572 Hum Mutat. 2008 Nov;29(11):1342-54.
- 573 38. Stone EA, Sidow A. Physicochemical constraint violation by missense substitutions  
574 mediates impairment of protein function and disease severity. Genome Research.  
575 2005;15(7):978-986.
- 576 39. Swofford, D. L. 2002. PAUP\*. Phylogenetic Analysis Using Parsimony (\*and Other  
577 Methods). Version 4. Sinauer Associates, Sunderland, Massachusetts.
- 578 40. Maddison, W. P. and D.R. Maddison. 2018. Mesquite: a modular system for evolutionary  
579 analysis. Version 3.51 <http://www.mesquiteproject.org>



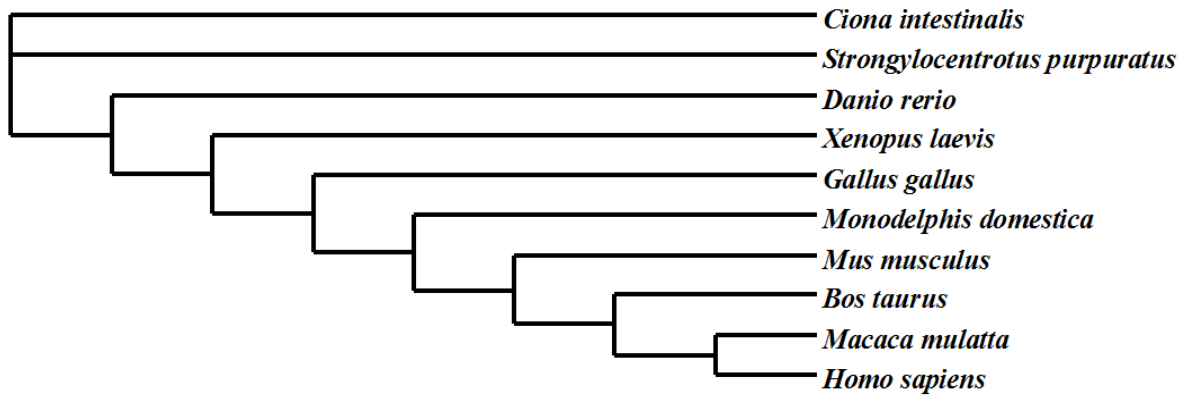

597

598 **Figure 2A. Ten species phylogenetic consensus tree for the APC protein constructed**

599 **using the computational phylogenetics program PAUP\* (Phylogenetic Analysis Using**

600 **Parsimony \*and other methods).**

601

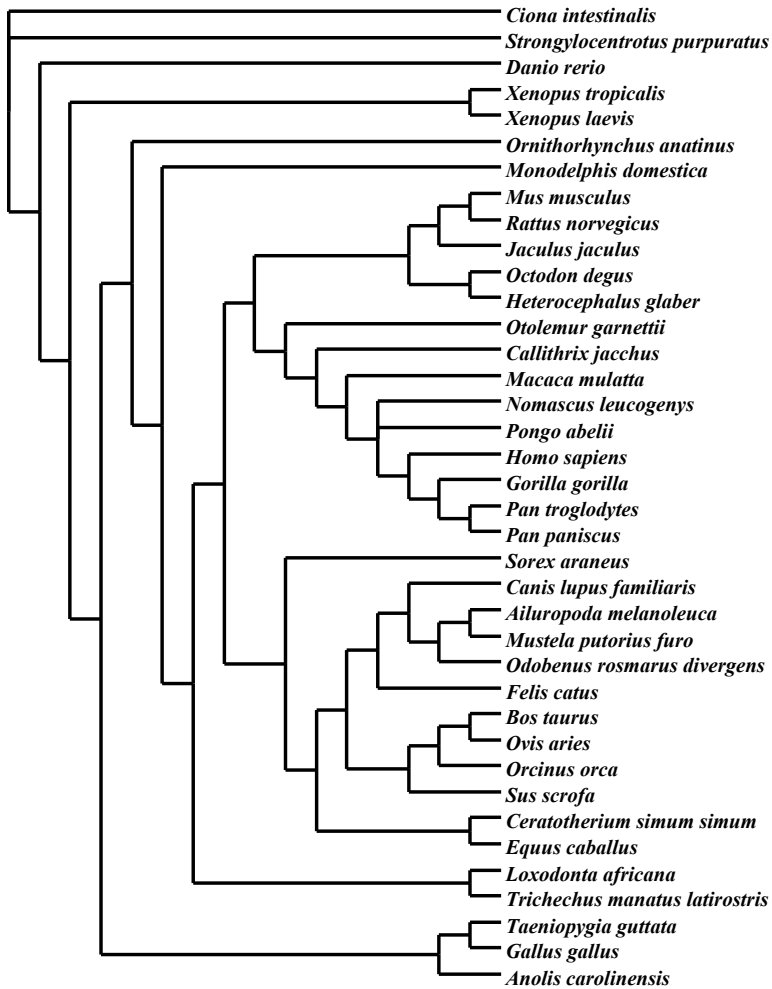

602

603 **Figure 2B. Thirty-eight species phylogenetic consensus tree for the APC protein**  
604 **constructed using the computational phylogenetics program PAUP\* (Phylogenetic**  
605 **Analysis Using Parsimony \*and other methods).**

606

607

608

609

610

611

612

613 **(PDF in Separate File)**

614 **Supplementary Figure 1. Curated 10-Species APC alignment.** PMSA was generated from  
615 the program Clustal Omega. Exon boundaries are labeled in red with a black background. The  
616 domains are highlighted throughout the alignment. Grey is oligomerization domain, red is  
617 Armadillo repeats, yellow is Beta Catenin Repeats, green is a sequence with homology to the  
618 herpes virus (PHA03307), turquoise is the Basic domain, and purple is the EB1 and HDLG  
619 binding site.

620

621

622 **(PDF in Separate File)**

623 **Supplementary Figure 2. 38-Species APC alignment.** PMSA was generated from the  
624 program Clustal Omega. No annotation is added.

625

626
